# Supplementary material for: Programmable v-type valve for cell and particle manipulation in microfluidic devices
Source: Royal Society of Chemistry journal article supplement (doi:10.1039/c5lc01206f), 2015-11-24

# Programmable V-type Valve for Cell and Particle Manipulation in Microfluidic Devices

Hoon Suk Rho<sup>1, #</sup>, Yoonsun Yang<sup>2, #</sup>, Alexander T. Hanke<sup>3</sup>, Marcel Ottens<sup>3</sup>,  
Leon W.M.M. Terstappen<sup>2</sup>, and Han Gardeniers<sup>1, \*</sup>

<sup>1</sup>Mesoscale Chemical Systems Group, MESA+ Institute for Nanotechnology,  
University of Twente, The Netherlands,

<sup>2</sup>Medical Cell BioPhysics Group, MIRA Institute for Biomedical Technology and Technical  
Medicine, University of Twente, The Netherlands,

<sup>3</sup>BioProcess Engineering group, Department of Biotechnology, Delft University of Technology,  
Faculty of Applied Sciences, The Netherlands.

<sup>#</sup>These two authors contributed equally to this work.

Corresponding Author

\* Mesoscale Chemical Systems

Faculty of Science and Technology

University of Twente

7500 AE Enschede

The Netherlands

Telephone # +31-(0)53-489-4356

j.g.e.gardeniers@utwente.nl

## Contents

|                                                                                                |           |
|------------------------------------------------------------------------------------------------|-----------|
| <b>Fig. S1</b> Three-dimensional schematic illustration of the operation of a v-type valve ... | Page S2   |
| <b>Fig. S2</b> Mask design of a device with various v-type valves .....                        | Page S3   |
| <b>Fig. S3</b> Actuation of v-type valves at various applied pressures .....                   | Page S4-5 |
| <b>Fig. S4</b> Measurement of actuated heights of v-type valves.....                           | Page S6   |
| <b>Fig. S5</b> Design and operation of a device for isolation of micro-particles .....         | Page S7   |
| <b>Fig. S6</b> Mask design of a device for sieving particles out of a droplet .....            | Page S8   |

**Fig. S1** Three-dimensional schematic illustration of the operation of a v-type valve. A. Actuation of the v-type valve for particle capture and B. Deactuation of the v-type valve for particle release.

**A**

*V-type valve on for particle capture*

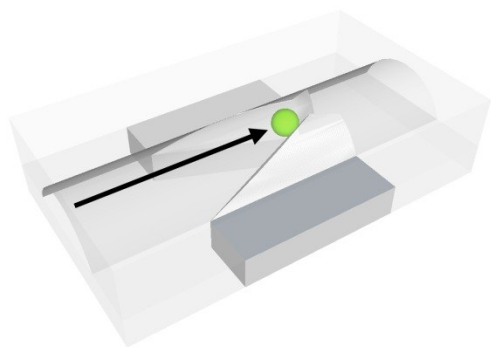

**B**

*V-type valve off for particle release*

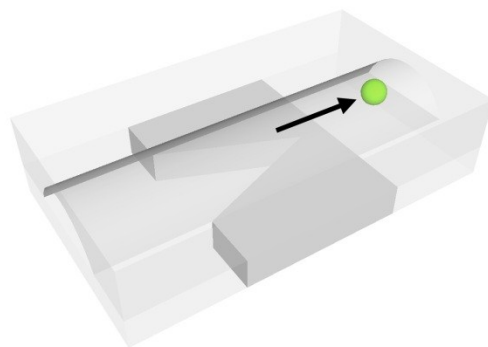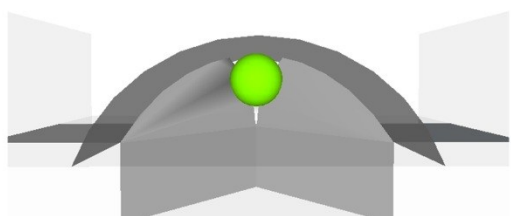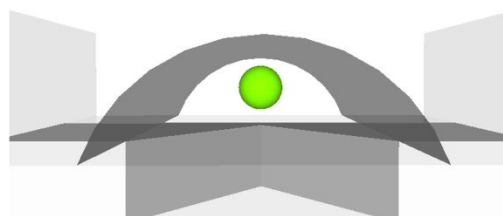

**Fig. S2** Photolithographic mask designs (Clewin software) of a microfluidic device to evaluate design parameters of v-type valves and to test actuation of various v-type valves at various applied pressures.

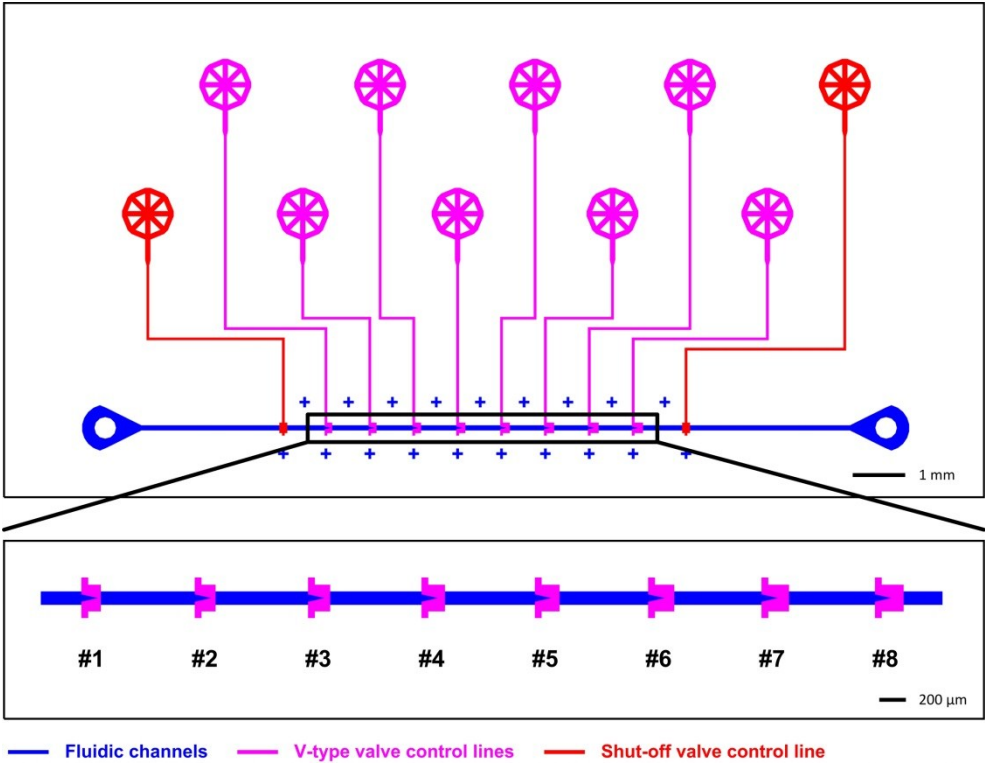

**Fig. S3** Actuation of v-type valves at various applied pressures (top view). A. Design #1, B. Design #2, C. Design #3, D. Design #4, E. Design #5, F. Design #6, G. Design #7, and H. Design #8.

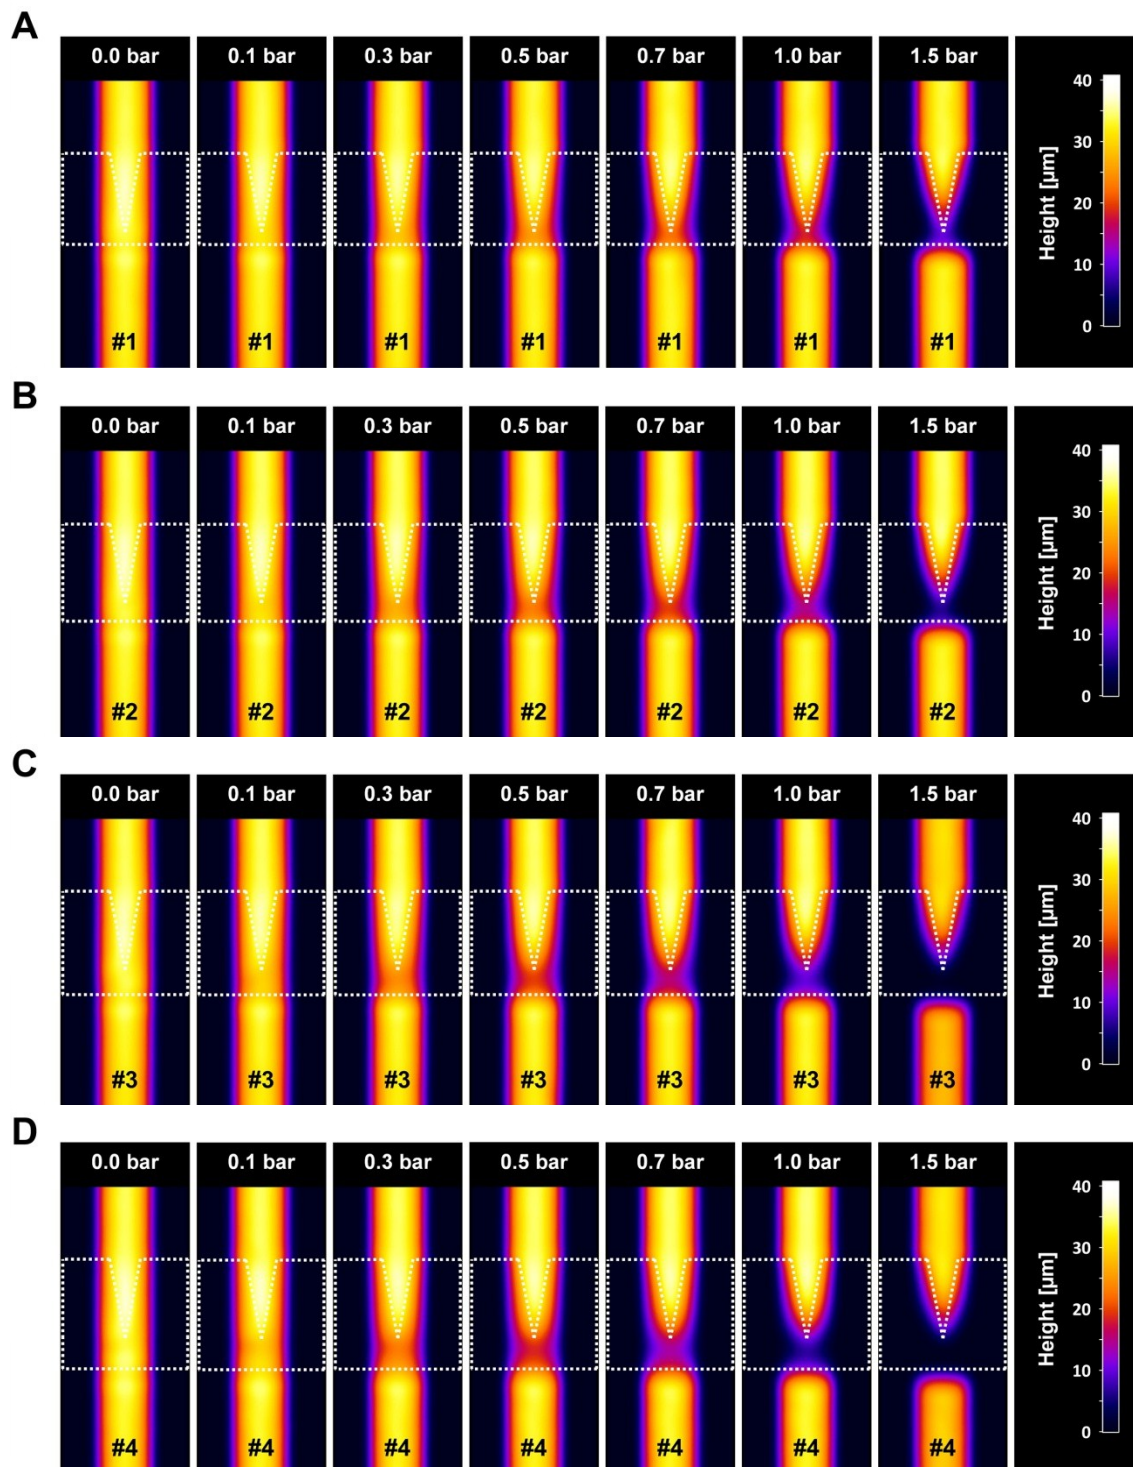

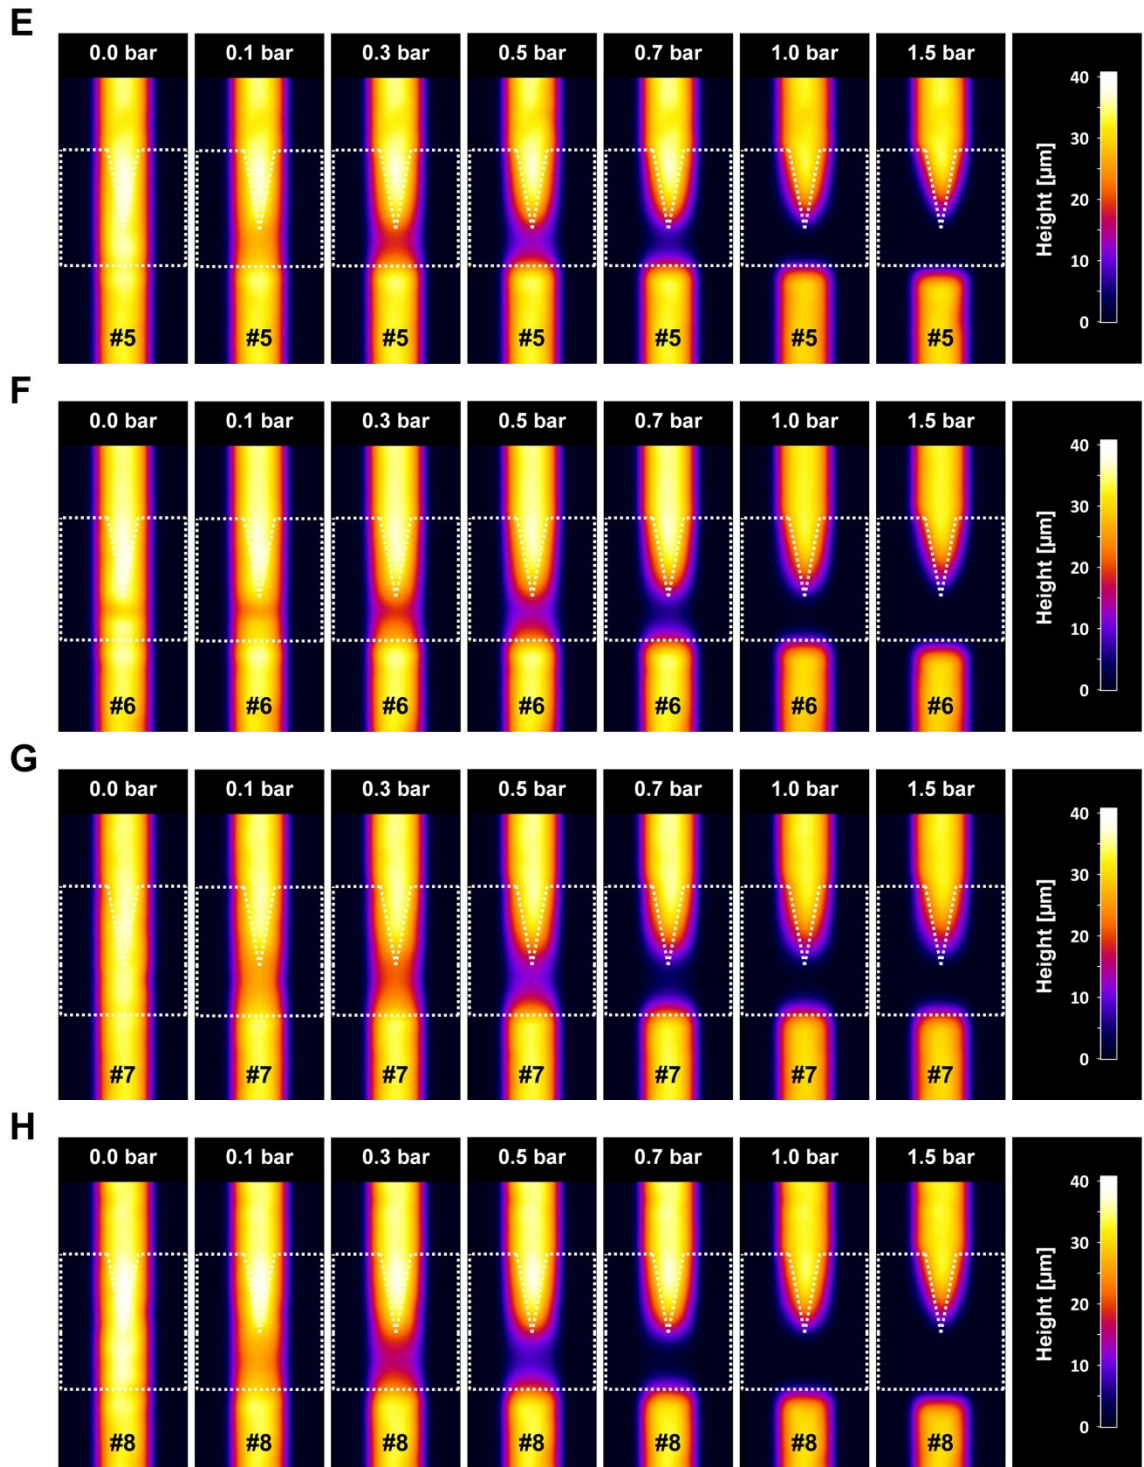



**Fig. S4** A. Measurement of actuated heights of v-type valves at various applied pressures. (a) Design #1, (b) Design #2, (c) Design #3, and (d) Design #4. B. Applied pressures for capturing of  $\varnothing$  15  $\mu\text{m}$  and  $\varnothing$  7  $\mu\text{m}$  with valve design #1, #2, #3, and #4.

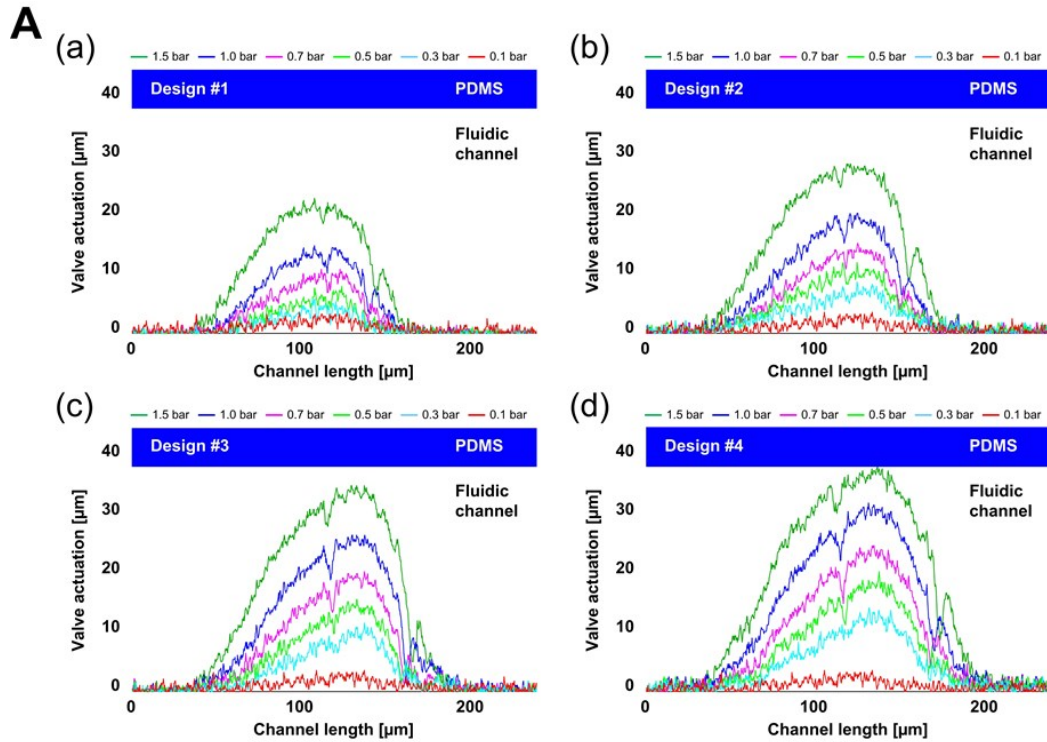

**B**

| Valve design | Particle size                  | Applied pressure [bar] |       |       |       |       |       |       |       |       |       |       |       |       |       |       |       |       |       |       |       |       |
|--------------|--------------------------------|------------------------|-------|-------|-------|-------|-------|-------|-------|-------|-------|-------|-------|-------|-------|-------|-------|-------|-------|-------|-------|-------|
|              |                                | 0                      | 0.1   | 0.2   | 0.3   | 0.4   | 0.5   | 0.6   | 0.7   | 0.8   | 0.9   | 1.0   | 1.1   | 1.2   | 1.3   | 1.4   | 1.5   | 1.6   | 1.7   | 1.8   | 1.9   | 2.0   |
| #1           | $\varnothing$ 7 $\mu\text{m}$  | Green                  | Green | Green | Green | Green | Green | Green | Green | Green | Green | Green | Green | Green | Green | Green | Green | Green | Green | Green | Green | Green |
|              | $\varnothing$ 15 $\mu\text{m}$ | Green                  | Green | Green | Green | Green | Green | Green | Green | Green | Green | Green | Green | Green | Green | Green | Green | Green | Green | Green | Green | Green |
| #2           | $\varnothing$ 7 $\mu\text{m}$  | Green                  | Green | Green | Green | Green | Green | Green | Green | Green | Green | Green | Green | Green | Green | Green | Green | Green | Green | Green | Green | Green |
|              | $\varnothing$ 15 $\mu\text{m}$ | Green                  | Green | Green | Green | Green | Green | Green | Green | Green | Green | Green | Green | Green | Green | Green | Green | Green | Green | Green | Green | Green |
| #3           | $\varnothing$ 7 $\mu\text{m}$  | Green                  | Green | Green | Green | Green | Green | Green | Green | Green | Green | Green | Green | Green | Green | Green | Green | Green | Green | Green | Green | Green |
|              | $\varnothing$ 15 $\mu\text{m}$ | Green                  | Green | Green | Green | Green | Green | Green | Green | Green | Green | Green | Green | Green | Green | Green | Green | Green | Green | Green | Green | Green |
| #4           | $\varnothing$ 7 $\mu\text{m}$  | Green                  | Green | Green | Green | Green | Green | Green | Green | Green | Green | Green | Green | Green | Green | Green | Green | Green | Green | Green | Green | Green |
|              | $\varnothing$ 15 $\mu\text{m}$ | Green                  | Green | Green | Green | Green | Green | Green | Green | Green | Green | Green | Green | Green | Green | Green | Green | Green | Green | Green | Green | Green |

■ Pass through the valve area   
 ■ Captured by the valve   
 ■ No flow in the channel

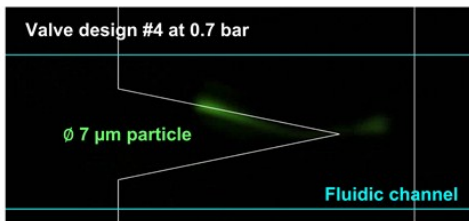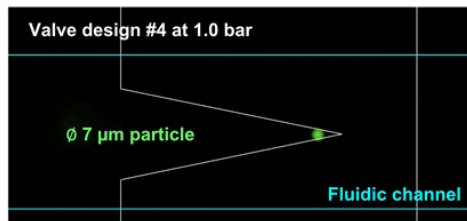

**Fig. S5** Design and operation of a microfluidic device for isolation of micro-particles. A. Photolithographic mask design (Clewin software) of the device, and B. Series of operation through step-by-step images.

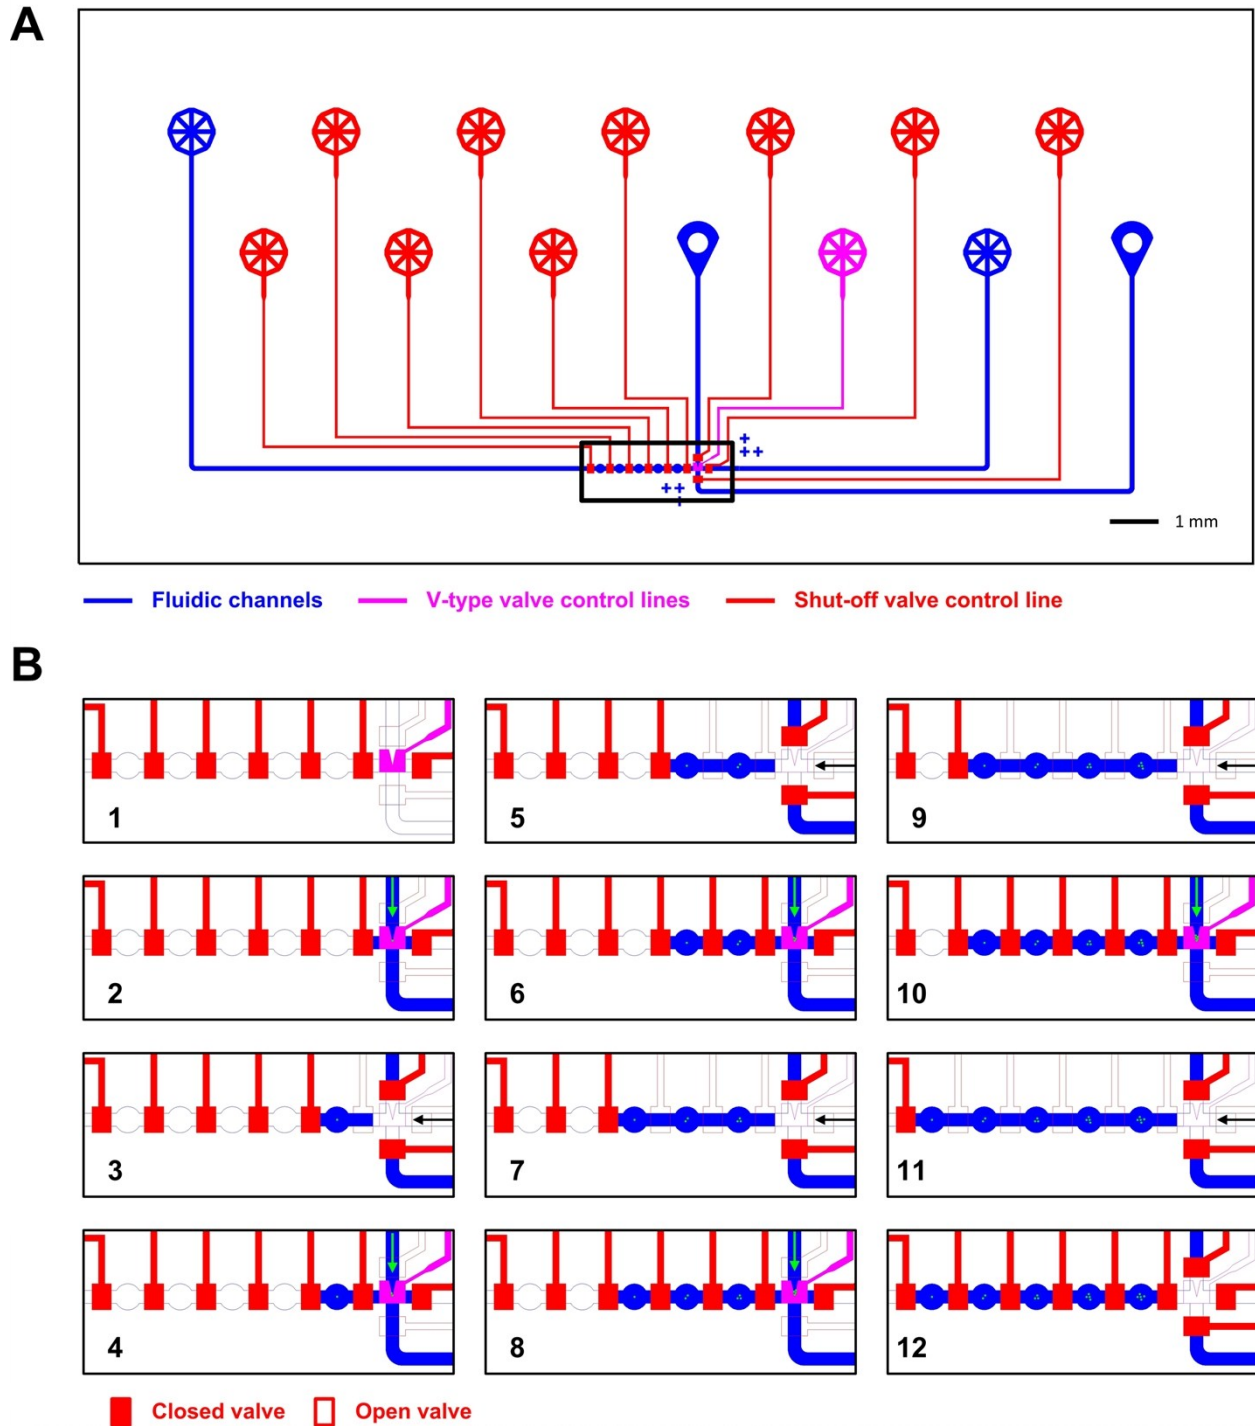

**Fig. S6** Photolithographic mask designs (Clewin software) of a microfluidic device for sieving particles out of a water-phase droplet in the flow of oil phase.

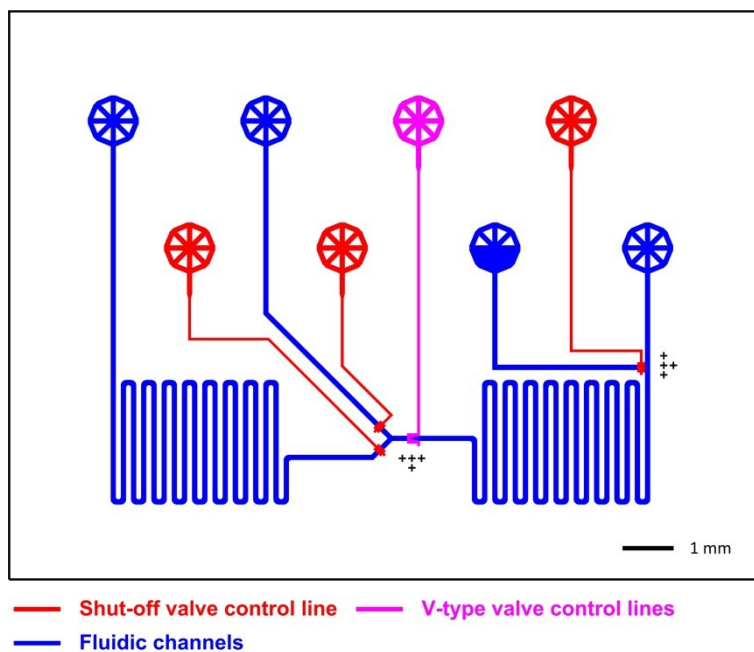

Supplement: c5lc01206f1.pdf [file c5lc01206f1.pdf]
